# Supplementary material for: Dipeptidyl peptidase-4 inhibitors alleviate cognitive dysfunction in type 2 diabetes mellitus
Source: PubMed Central journal article supplement (PMC10712048; doi:10.1186/s12944-023-01985-y), 2023-12-11
Supplement: 12944_2023_1985_MOESM1_ESM.pdf [file 12944_2023_1985_MOESM1_ESM.pdf]

This document certifies that the manuscript

## **Dipeptidyl peptidase 4 inhibitors attenuate cognitive function in type 2 diabetes mellitus: A systematic review and meta-analysis**

prepared by the authors

**Feng Tao, Liu Xin**

was edited for proper English language, grammar, punctuation, spelling, and overall style by one or more of the highly qualified native English speaking editors at AJE.

This certificate was issued on **August 20, 2023** and may be verified on the [AJE website](#) using the verification code **4E58-BC96-3932-98FA-28EP**.

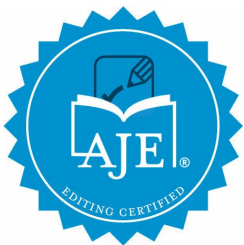

Neither the research content nor the authors' intentions were altered in any way during the editing process. Documents receiving this certification should be English-ready for publication; however, the author has the ability to accept or reject our suggestions and changes. To verify the final AJE edited version, please visit our verification page at [aje.com/certificate](#). If you have any questions or concerns about this edited document, please contact AJE at [support@aje.com](mailto:support@aje.com).
